# Supplementary material
Source: PubMed Central journal article supplement (PMC4781670)
Supplement: NIHMS208097-supplement-01.pdf [file NIHMS208097-supplement-01.pdf]

**Supplemental Data:**

**Opposing Nodal/Vg1 and BMP signals mediate axial patterning in embryos of the basal chordate amphioxus**

T. Onai, J.-K. Yu, I. L. Blitz, K. W. Y. Cho, L. Z. Holland

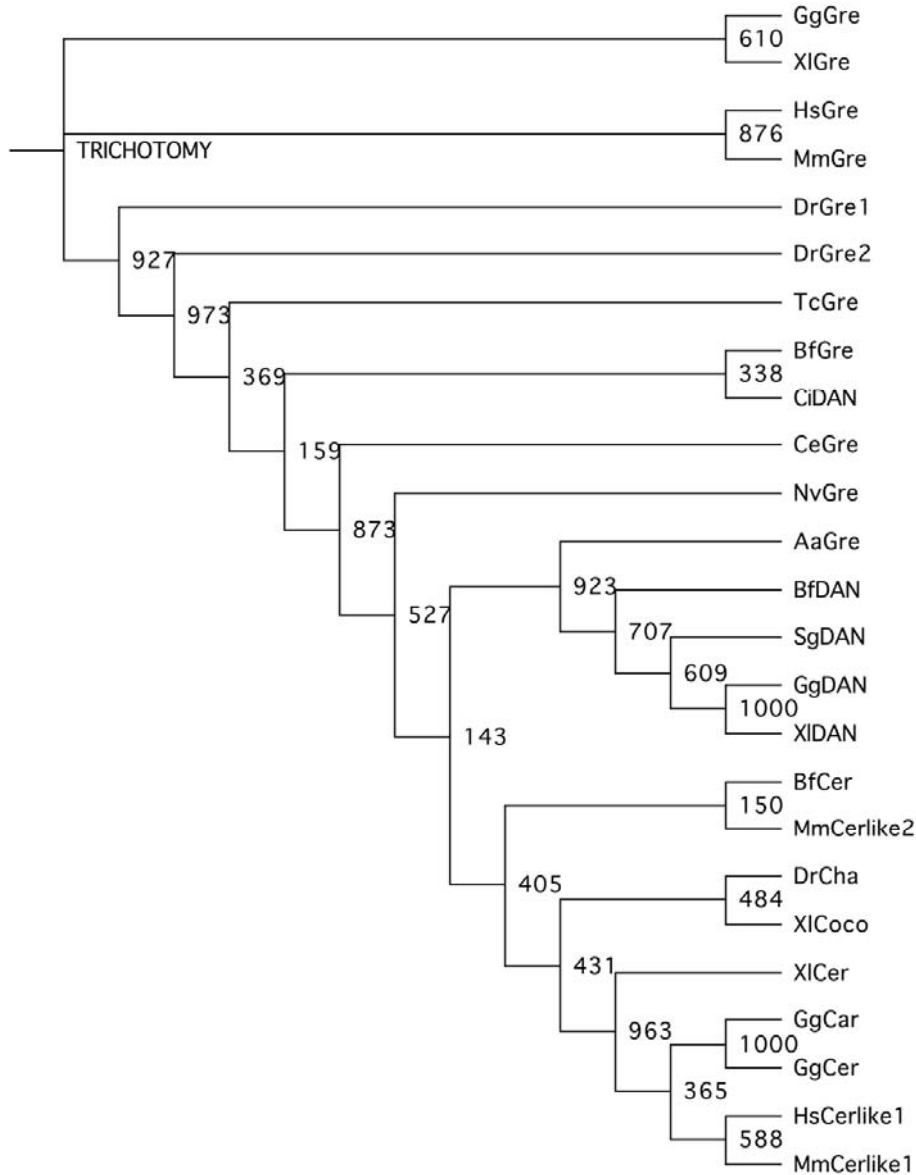

**Figure S1. Unrooted tree of Dan Family proteins.** Sequences were aligned with MAFFT (<http://align.bmr.kyushu-u.ac.jp/mafft/online/server/>) using default settings for proteins. The phylogenetic tree was inferred with ClustalW (<http://clustalw.ddbj.nig.ac.jp/top-i.html>) at the DDBJ server. Support values were with the NJ tree option with 1000 bootstrap trials. Aa, *Aedes aegypti*, Bf, *Branchiostoma floridae*, Ce, *Caenorhabditis elegans*, Ci, *Ciona intestinalis*, Dr, *Danio rerio*, Gg, *Gallus gallus*, Hs, *Homo sapiens*, Mm, *Mus musculus*, Sg, *Saccoglossus kowalevskii*, Tc, *Tribolium castenaneum*, XI, *Xenopus laevis*.

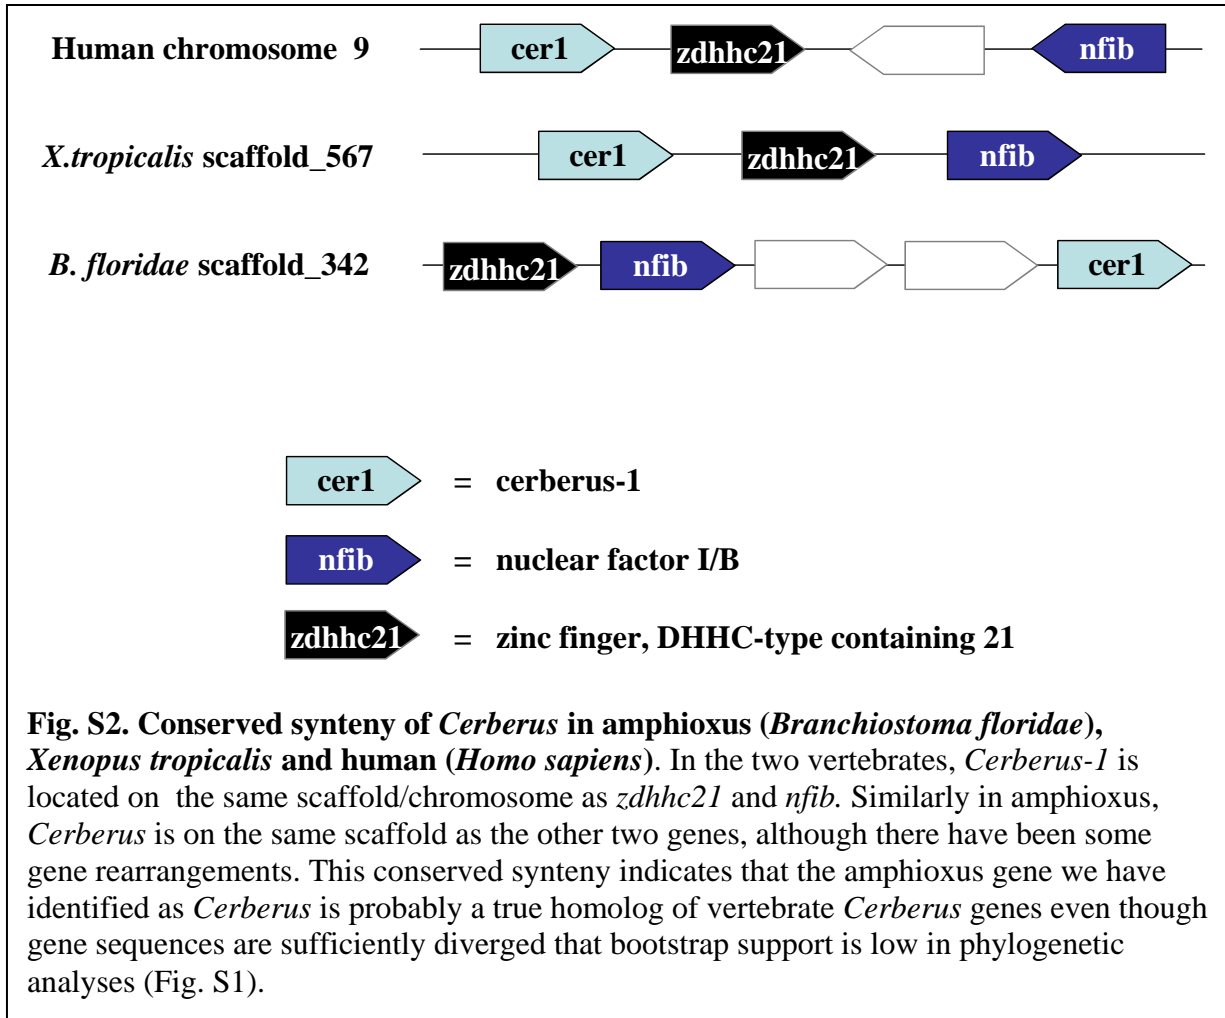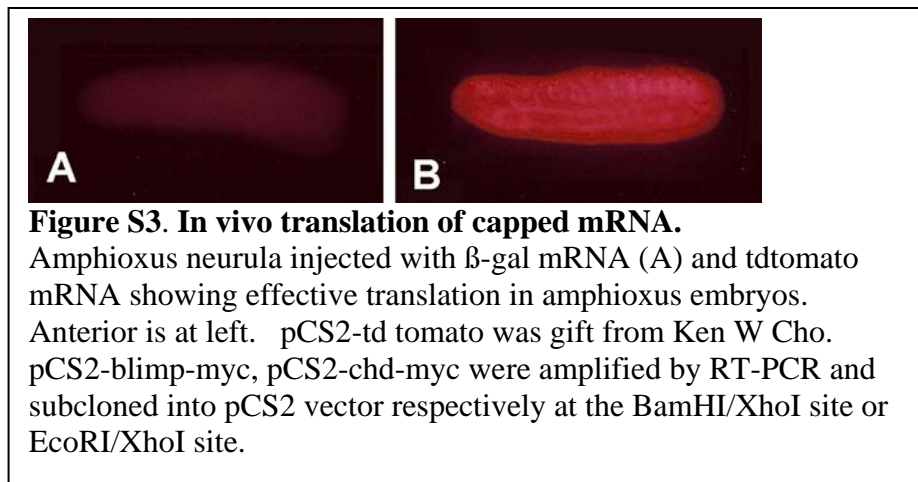

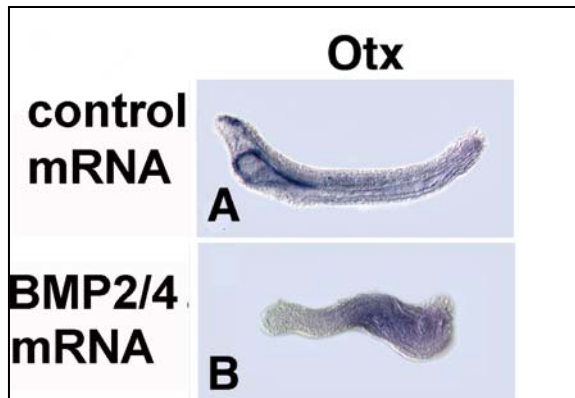

**Figure S4. Overexpression of BMP2/4 mRNA suppresses dorsal-anterior development.** A). 36 hr larva injected with the control mRNA. Anterior at left. B). Embryos that are injected with amphibMP2/4 mRNA do not express the forebrain and pharynx marker Otx and are strongly posteriorized.

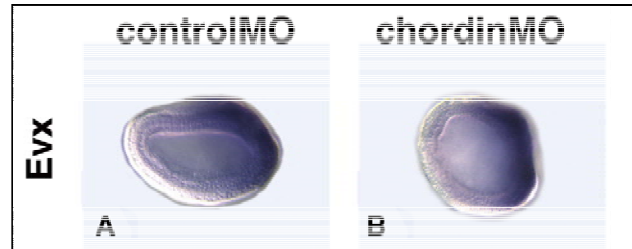

**Figure S5. Attenuation of chordin has little effect on Evx expression.**

A). Evx is expressed in the posterior CNS and around the blastopore at the very early neurula stage B). Although the Chordin MO delays development, the expression pattern of Evx is normal.

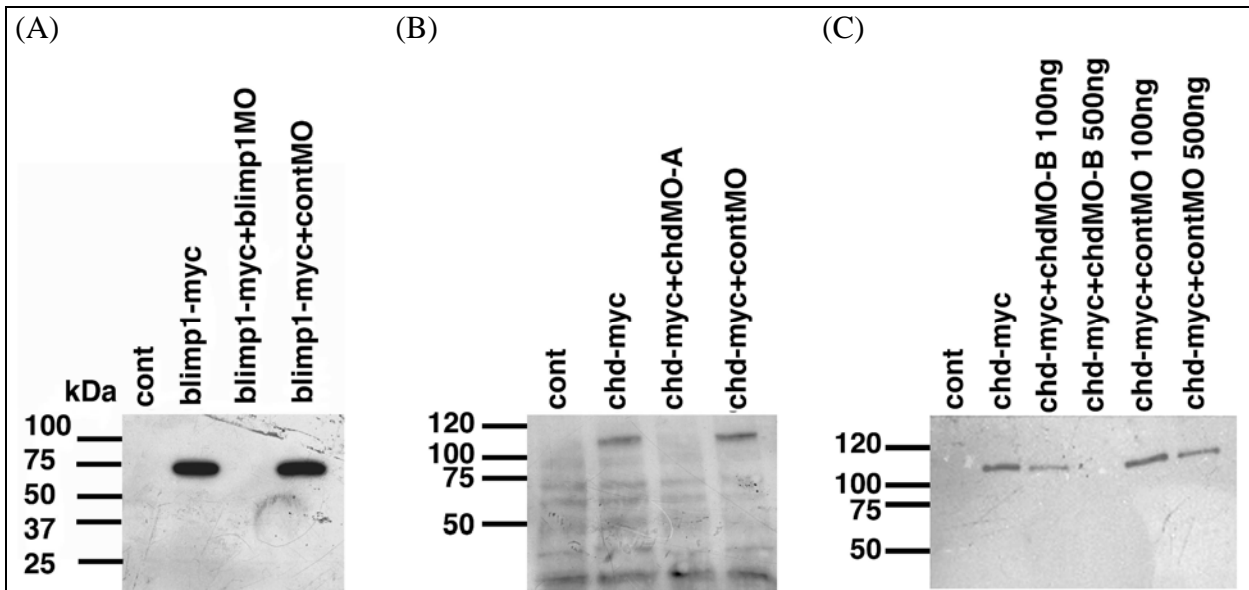

**Figure S6. In vitro translation demonstrates that MOs effectively block translation.** Control lanes at left included the pCS2 vector, no MO. Second lanes from left, plasmid but no MO. Third lanes from left plasmid plus gene-specific MO. Fourth lanes from left, plasmid plus control MO. A) Amphioxus Blimp1 MO. B) Amphioxus *Chordin* morpholino-A. C) Amphioxus *Chordin* MO-B. morpholino. In vitro translation for the *pCS2Amphichd-myc* and *pCS2Amphiblimp-myc* plasmids was with the TNT SP6 Quick Coupled Transcription/Translation System (Promega Inc., Fitchburg, WI, USA). Samples separated on SDS-polyacrylamide gels were subjected to western blotting and probed with an anti-myc antibody (Roche Molecular Biochemicals, Indianapolis, IN, USA at a 1:1000 dilution. Detection was with the Amersham ECL PLUS™ Western Blotting Detection Reagents (GE Healthcare, Piscataway, NJ, USA).

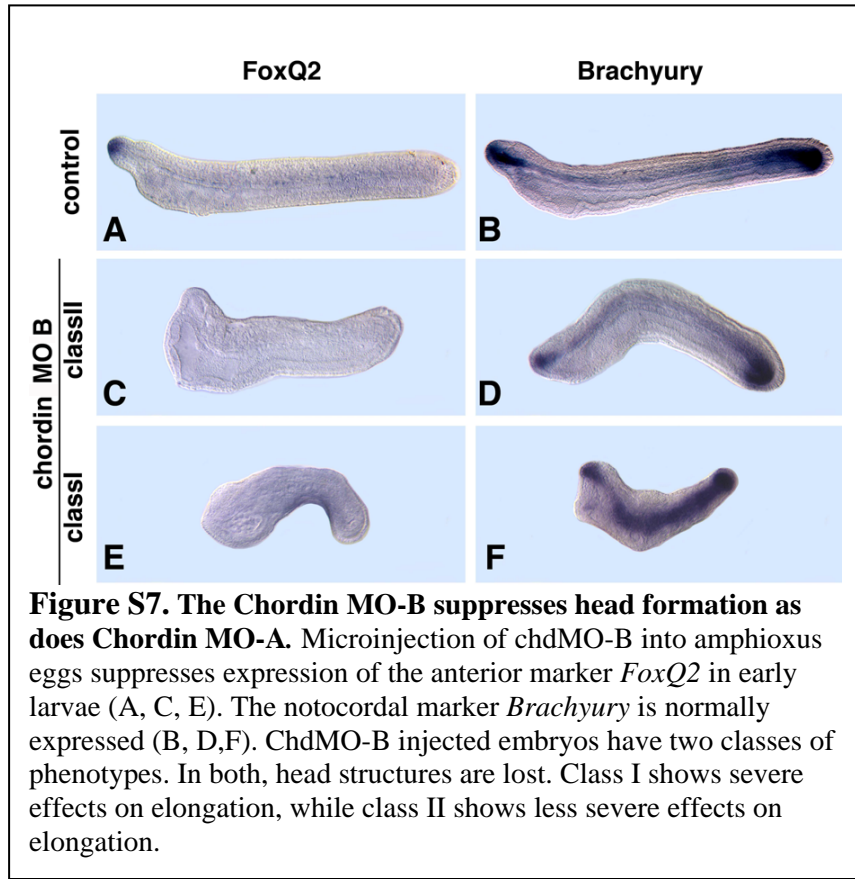

The numbers of embryos injected and the percentage expressing a particular phenotype for each treatment are listed below for each text figure.

Fig2. Human activin protein was added to about 200 embryos for each of 3 egg batches. More than 80% had the expanded head expanded phenotype at the neurula stage. For gastrula stage embryos, the phenotypes are representative ones. Ten or more embryos per probe were assayed and more than 80% showed the representative phenotype.

Fig3. For gastrula phenotypes, more than 100 embryos per batch were treated with SB505124. At least 10 embryos for each probe were analyzed. The phenotypes showed in the figures are representative of more than 90% of the embryos. For neurula stage phenotypes, about 200-300 embryos per batch were treated with SB505124. Over 90% showed the representative phenotype.

Fig4. We injected more than 100 embryos per batch for each of 4 egg batches with 1.0 $\mu$ g/ $\mu$ l BMP2/4 mRNA. Only strongly fluorescence embryos were assayed. The neurula phenotypes shown are characteristic of more than 60% of the embryos assayed. For the figure 4 I-K the numbers of embryos are I (100% n=10), J (100% n=15), K (66% n=21)

Fig5. We injected 1.0 mM chdMOA into more than 100 embryos/each of 10 batches and isolated only strongly fluorescent embryos. The phenotypes shown for neurula to larva are representative of more than 60% of the embryos assayed. For gastrula fixed embryos, we analyzed the embryos

10-15 embryos/probes and the phenotypes are representative of more than 80% of the embryos assayed.

Fig6. We injected 1.0 $\mu$ g/ $\mu$ l Cerberus mRNA into more than 100 embryos/batch for 2 times and isolated only strongly fluorescence embryos. The neurula phenotypes are representative of more than 60% of embryos assayed. We injected 1.0mM blimp1 MO into more than 100 embryos/batch for 4 times and isolated only strongly fluorescence embryos. The phenotypes are representative of more than 60% of embryos assayed.

Fig7 For *Xenopus* injections, the numbers of the embryos are A (100% n=10), B (37% n=8), C (100% n=12), D (100% n=8), E (100% n=12), F (100% n=14)
